# Supplementary material for: Genomic and Phenotypic Analysis of Linezolid-Resistant Staphylococcus epidermidis in a Tertiary Hospital in Innsbruck, Austria
Source: MDPI journal article supplement (doi:10.3390/microorganisms9051023), 2021-05-10
Supplement: s1 [file s1]

**Genomic and phenotypic analysis of Linezolid-resistant *Staphylococcus epidermidis* a tertiary hospital in Innsbruck, Austria**

Supplementary Material

Silke Huber<sup>1\*</sup>, Miriam A. Knoll<sup>1\*</sup>, Michael Berktold<sup>1</sup>, Reinhard Würzner<sup>1</sup>, Anita Brindlmayer<sup>2</sup>, Viktoria Weber<sup>2</sup>, Andreas E. Posch<sup>3</sup>, Katharina Mrazek<sup>3</sup>, Sarah Lepuschitz<sup>3</sup>, Michael Ante<sup>3</sup>, Stephan Beisken<sup>3</sup>, Dorothea Orth-Höller<sup>4#</sup>, Johannes Weinberger<sup>3</sup>

\*authors contributed equally

#corresponding author

<sup>1</sup>Institute of Hygiene and Medical Microbiology, Medical University of Innsbruck, Innsbruck, Austria

<sup>2</sup>Center for Biomedical Technology, Department for Biomedical Research, Danube University Krems, Krems, Austria

<sup>3</sup>Ares Genetics GmbH, Vienna, Austria

<sup>4</sup>MB-LAB – Clinical Microbiology Laboratory, Innsbruck, Austria

Correspondence to:

Dorothea Orth-Höller, MD

MB-LAB Clinical Microbiology Laboratory

Franz-Fischer-Straße 7b

6020 Innsbruck, Austria

Email: [do@mb-lab.com](mailto:do@mb-lab.com)

Phone: +43 (0)512 563380

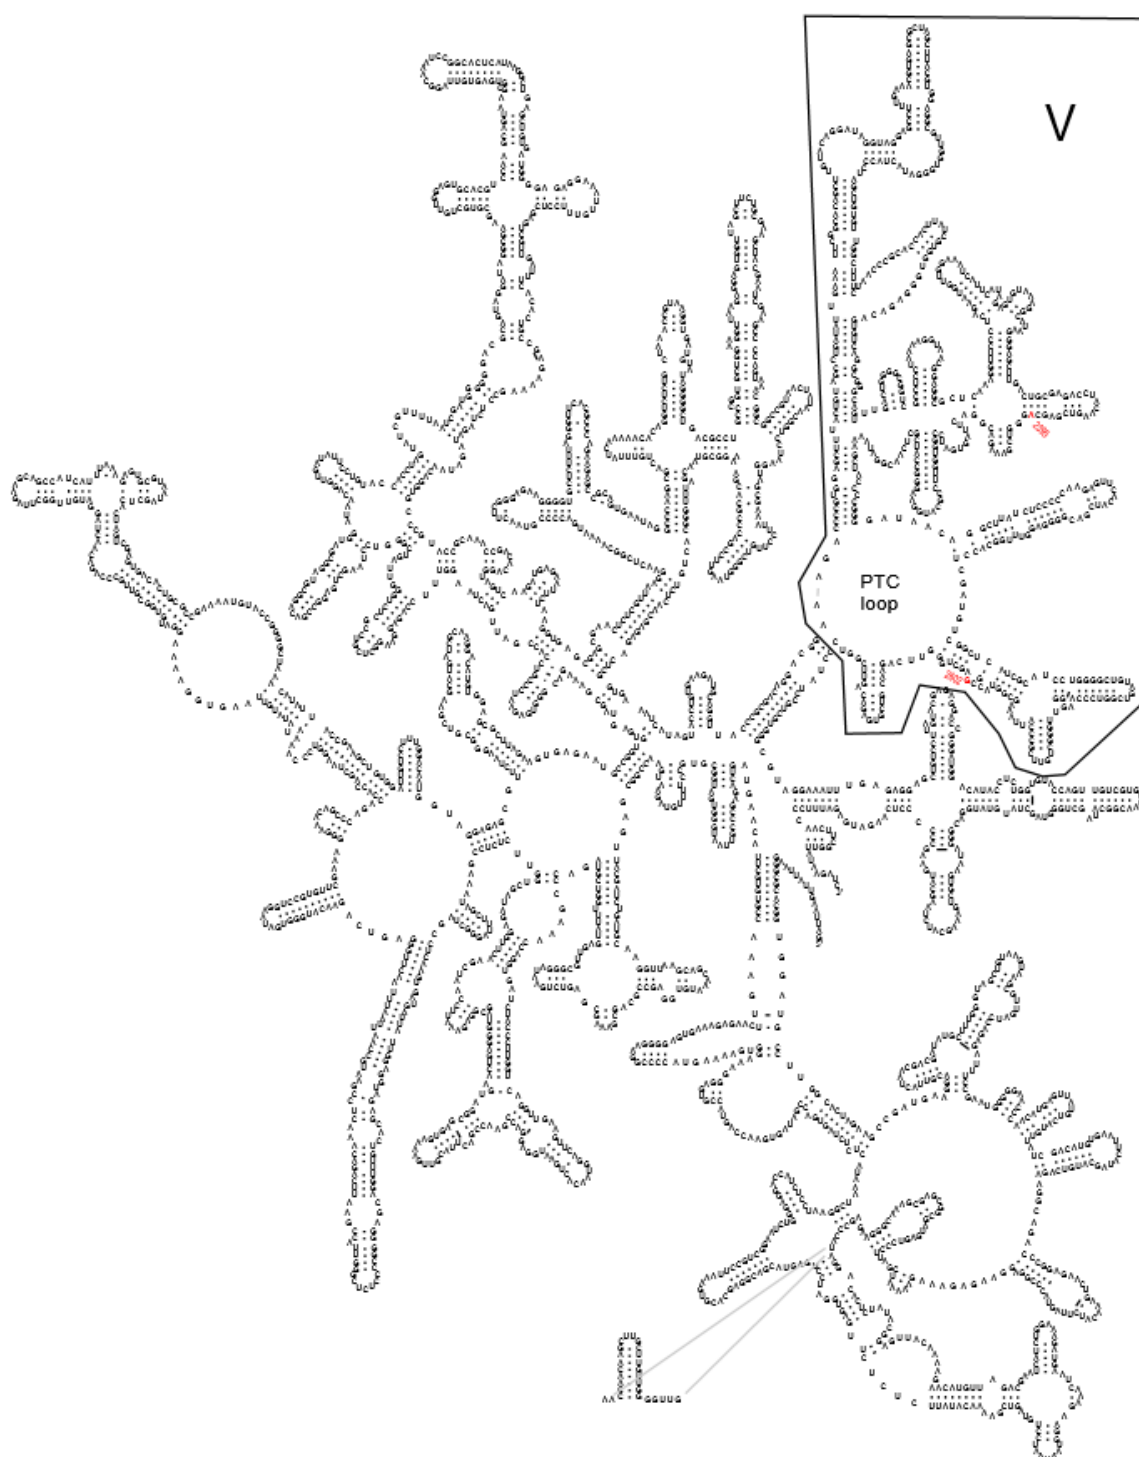

**Figure S1.** Novel mutations in the 23S rRNA region linked to linezolid resistance in *S. epidermidis*. Novel variants associated with linezolid resistance include A131G, G262U, G1256U, G1273A, and A2395AG. Interestingly, only insertion A2395AG maps into Domain V. The image was obtained from [RNAcentral](#), domain V, target peptidyltransferase centre (PTC) loop, and mutations within the domain V were highlighted according to the [RNAcentral Consortium](#).

**Table S1.** Overview of point mutations of the 23S rRNA and ribosomal protein L3 and L4 that were investigated.

| Investigated point mutations associated with linezolid resistance |                                                                                                                                                                                                                                                |
|-------------------------------------------------------------------|------------------------------------------------------------------------------------------------------------------------------------------------------------------------------------------------------------------------------------------------|
| Mutation of 23S rRNA<br>( <i>E. coli</i> numbering)               | A2062C, A2453C, A2453G, A2503G, A2503U, A2572U, C2452U, C2499U, C2534U, C2571G, C2612A, G2032A, G2032C, G2032U, G2061U, G2447U, G2505A, G2528U, G2576U, G2603U, G2608C, G2608U, U2132A, U2211G, U2357A, U2500A, U2500C, U2504A, U2504C, U2504G |
| Mutation of 23S rRNA<br>( <i>S. aureus</i> numbering)             | G2603U                                                                                                                                                                                                                                         |
| Mutation of the<br>ribosomal protein L3                           | V96D, Q136L, G137D, G137S, G139R, H146P, H146R, F147I, F147L, F147Y, P151L, G152D, V154L, G155R, M156T, A157R, S158F, D159E, D159Y, M169L                                                                                                      |
| Mutation of the<br>ribosomal protein L4                           | N20S, A22T, K68Q, G71D, L108S, A133T, V155I                                                                                                                                                                                                    |

**Table S2.** Number of valid data for general, laboratory and clinical parameters collected. Percentages are given in brackets.

| Parameters                  | Numbers and percentage of valid values |
|-----------------------------|----------------------------------------|
| General parameters          |                                        |
| Date of sampling            | 130 (100.00)                           |
| Gender                      | 130 (100.00)                           |
| Age                         | 130 (100.00)                           |
| Weight                      | 112 (86.15)                            |
| Laboratory parameters       |                                        |
| ASAT                        | 128 (98.46)                            |
| ALAT                        | 128 (98.46)                            |
| $\gamma$ GT                 | 128 (98.46)                            |
| CRP                         | 129 (99.23)                            |
| PCT                         | 60 (46.15)*                            |
| Clinical parameters         |                                        |
| Ward                        | 130 (100.00)                           |
| Duration of hospitalization | 130 (100.00)                           |
| Source of Isolate           | 129 (99.23)                            |
| Linezolid use               | 108 (83.08)                            |
| Antimicrobial treatment     | 127 (97.69)                            |
| Death                       | 130 (100.00)                           |

ASAT: aspartate transaminase; ALAT: alanine transaminase;  $\gamma$ GT: gamma-glutamyltransferase;

CRP: C-reactive protein; PCT: procalcitonin

\*excluded from further statistical analysis

**Table S3.** Results of variant calling identified potential single nucleotide polymorphisms (SNPs) within 23S rRNA mutations causing resistance to linezolid in *Staphylococcus epidermidis*.

| SNPs                             | Number of respective SNPs within 12 Isolates with unknown Resistance Mechanisms | Total Number of respective SNPs within 129 Isolates |
|----------------------------------|---------------------------------------------------------------------------------|-----------------------------------------------------|
| AE015929.1594723.1597555:A131G   | 1                                                                               | 9                                                   |
| AE015929.1594723.1597555:G2602U  | 0                                                                               | 12                                                  |
| AE015929.1719192.1722024:C1596U  | 3                                                                               | 27                                                  |
| AE015929.1719192.1722024:G1914A  | 0                                                                               | 3                                                   |
| AE015929.1719192.1722024:G2602U  | 1                                                                               | 86                                                  |
| AE015929.1808510.1811337:G262U   | 0                                                                               | 64                                                  |
| AE015929.1808510.1811337:G1256U  | 1                                                                               | 10                                                  |
| AE015929.1808510.1811337:G1273A  | 4                                                                               | 81                                                  |
| AE015929.1808510.1811337:G2597U  | 0                                                                               | 15                                                  |
| AE015929.2332749.2335580:A2395AG | 12                                                                              | 56                                                  |
| AE015929.2332749.2335580:G2601U  | 1                                                                               | 90                                                  |
| AE015929.2377479.2380311:G267U   | 0                                                                               | 7                                                   |
| AE015929.2377479.2380311:G2602U  | 0                                                                               | 75                                                  |
| Total of 13 SNPs                 | 23                                                                              | 535                                                 |
